# Supplementary material for: Dynamics of plant DNA replication based on PCNA visualization
Source: PubMed Central journal article supplement (PMC4945867; doi:10.1038/srep29657), 2016-07-15
Supplement: srep29657-s1.pdf [file srep29657-s1.pdf]

## Supplementary information

Dynamics of plant DNA replication based on PCNA visualization

Ryohei Yokoyama<sup>1</sup>, Takeshi Hirakawa<sup>1</sup>, Seri Hayashi<sup>1</sup>, Takuya Sakamoto<sup>1</sup> and Sachihiro Matsunaga<sup>1\*</sup>

<sup>1</sup>*Department of Applied Biological Science, Faculty of Science and Technology, Tokyo University of Science, 2641 Yamazaki, Noda, Chiba 278-8510, Japan.*

\*For correspondence.

Sachihiro Matsunaga

*Department of Applied Biological Science, Faculty of Science and Technology, Tokyo University of Science, 2641 Yamazaki, Noda, Chiba 278-8510, Japan.*

Phone: +81-4-7124-1501      Fax: +81-4-7122-9104      E-mail:sachi@rs.tus.ac.jp

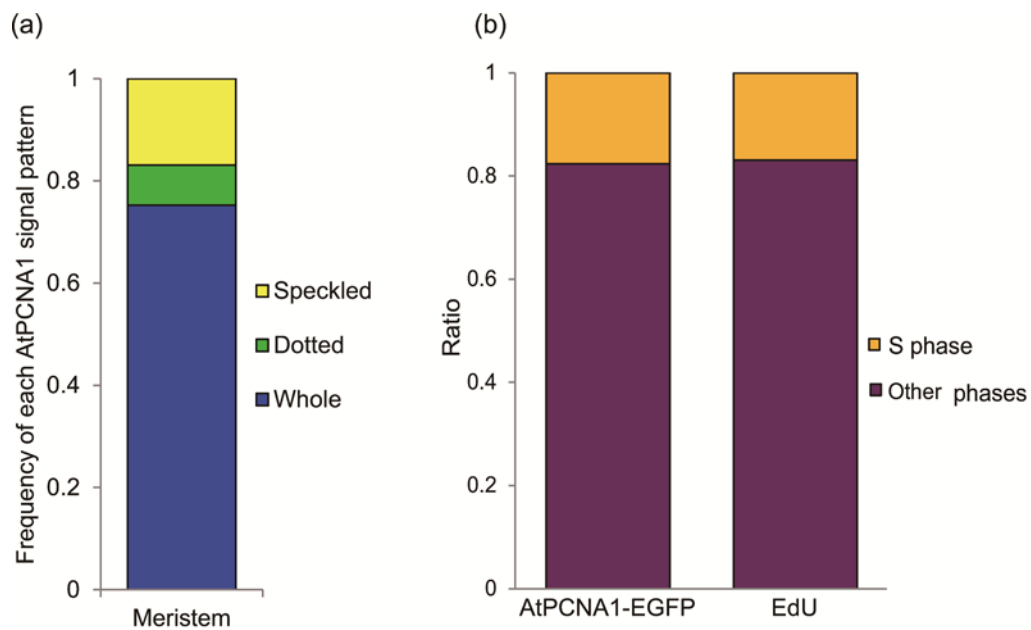

**Supplementary Figure S1.**

(a) Meristematic epidermal cells were used in AtPCNA1-EdU co-localization analyses ( $n = 307$  nuclei from three plants).

(b) Confirmation of the AtPCNA1-EGFP line as a useful marker line for visualization of S-phase progression. The ratio of the number of nuclei showing AtPCNA1 dotted and speckled patterns to total nuclei was calculated and compared with a previous report using EdU incorporation<sup>6</sup>.

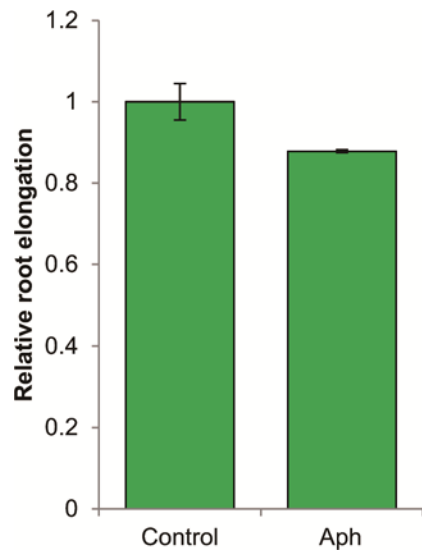

**Supplementary Figure S2.**

Relative root elongation of pAtPCNA1::AtPCNA1-EGFP on the control medium and medium supplemented with 12  $\mu\text{g}/\text{mL}$  aphidicolin. Root length was measured 24 h after transfer to each medium.

**Supplementary Table S1.** Classification of the pattern of AtPCNA1 and EdU signals in Fig 4.

| Type | AtPCNA1 signals | EdU signals |
|------|-----------------|-------------|
| I    | whole           | whole       |
| II   | whole           | speckled    |
| III  | whole           | negative    |
| IV   | dotted          | whole       |
| V    | speckled        | whole       |
| VI   | speckled        | mixed       |
| VII  | speckled        | speckled    |

**Supplementary Table S2.** PCR primers used in this study.

| No. | Name                      | Purpose    | Sequence                  | Tm(°C) |
|-----|---------------------------|------------|---------------------------|--------|
| 1   | AtPCNA1_forward_pENTR_PCR | Cloning    | CACCGGGCAAAGTCGGTTTTGGA   | 64     |
| 2   | AtPCNA1_reverse_pENTR_PCR | Cloning    | GGGATTAGTGTCTTCTTCTTCTTCA | 56     |
| 3   | AtPCNA1 sequence1         | Sequencing | GGGCTCGTTGTTGAAGAAGGTTCTA | 61     |
| 4   | AtPCNA1 sequence2         | Sequencing | GTAAAACGACGGCCAG          | 51     |
| 5   | AtPCNA1 sequence3         | Sequencing | GGAAACAGCTATGACCATG       | 51     |
